# Supplementary material
Source: PubMed Central journal article supplement (PMC4278403)
Supplement: NIHMS647292-supplement-SuppTables1_2.pdf [file NIHMS647292-supplement-SuppTables1_2.pdf]

**Supplementary Table 1: Cox Proportional Hazards Model for GSS**

| <b>Variable</b>          | <b>Hazard Ratio</b> | <b>95% Confidence Limits<br/>for Hazard Ratio</b> | <b>Parameter Estimate</b> | <b>Standard Error</b> | <b>p-value</b> |
|--------------------------|---------------------|---------------------------------------------------|---------------------------|-----------------------|----------------|
| <b>GSS &lt;3</b>         | 1.336               | 1.141 – 1.565                                     | 0.28977                   | 0.08066               | 0.0003         |
| <b>Treatment-Naïve</b>   | 0.801               | 0.687 – 0.935                                     | -0.22131                  | 0.07884               | 0.0050         |
| <b>Sequence mixtures</b> | 1.277               | 1.107 – 1.472                                     | 0.24421                   | 0.07264               | 0.0008         |
| <b>Retrospective</b>     | 1.271               | 1.067 – 1.514                                     | 0.23975                   | 0.08931               | 0.0073         |
| <b>Year</b>              | 0.975               | 0.955 – 0.995                                     | -0.02561                  | 0.01026               | 0.0126         |
| <b>Adherence</b>         | 0.984               | 0.982 – 0.985                                     | -0.01655                  | 0.00092               | <0.0001        |

**Supplementary Table 2: Cox Proportional Hazards Model for vPSS**

| <b>Variable</b>          | <b>Hazard Ratio</b> | <b>95% Confidence Limits<br/>for Hazard Ratio</b> | <b>Parameter Estimate</b> | <b>Standard Error</b> | <b>p-value</b> |
|--------------------------|---------------------|---------------------------------------------------|---------------------------|-----------------------|----------------|
| <b>vPSS &lt;3</b>        | 1.371               | 1.171 – 1.604                                     | 0.31531                   | 0.08026               | <0.0001        |
| <b>Treatment-Naïve</b>   | 0.839               | 0.718 – 0.981                                     | -0.17560                  | 0.07971               | 0.0276         |
| <b>Sequence mixtures</b> | 1.233               | 1.067 – 1.424                                     | 0.20936                   | 0.07365               | 0.0045         |
| <b>Retrospective</b>     | 1.281               | 1.074 – 1.528                                     | 0.24762                   | 0.08995               | 0.0059         |
| <b>Year</b>              | 0.979               | 0.959 – 0.999                                     | -0.02111                  | 0.01040               | 0.0422         |
| <b>Adherence</b>         | 0.984               | 0.982 – 0.985                                     | -0.01654                  | 0.00093               | <0.0001        |
| <b>Viral load at LLV</b> | 1.000               | 1.000 – 1.001                                     | 0.00040                   | 0.00016               | 0.0129         |
