# Supplementary material
Source: PubMed Central journal article supplement (PMC4278403)

# vPSS

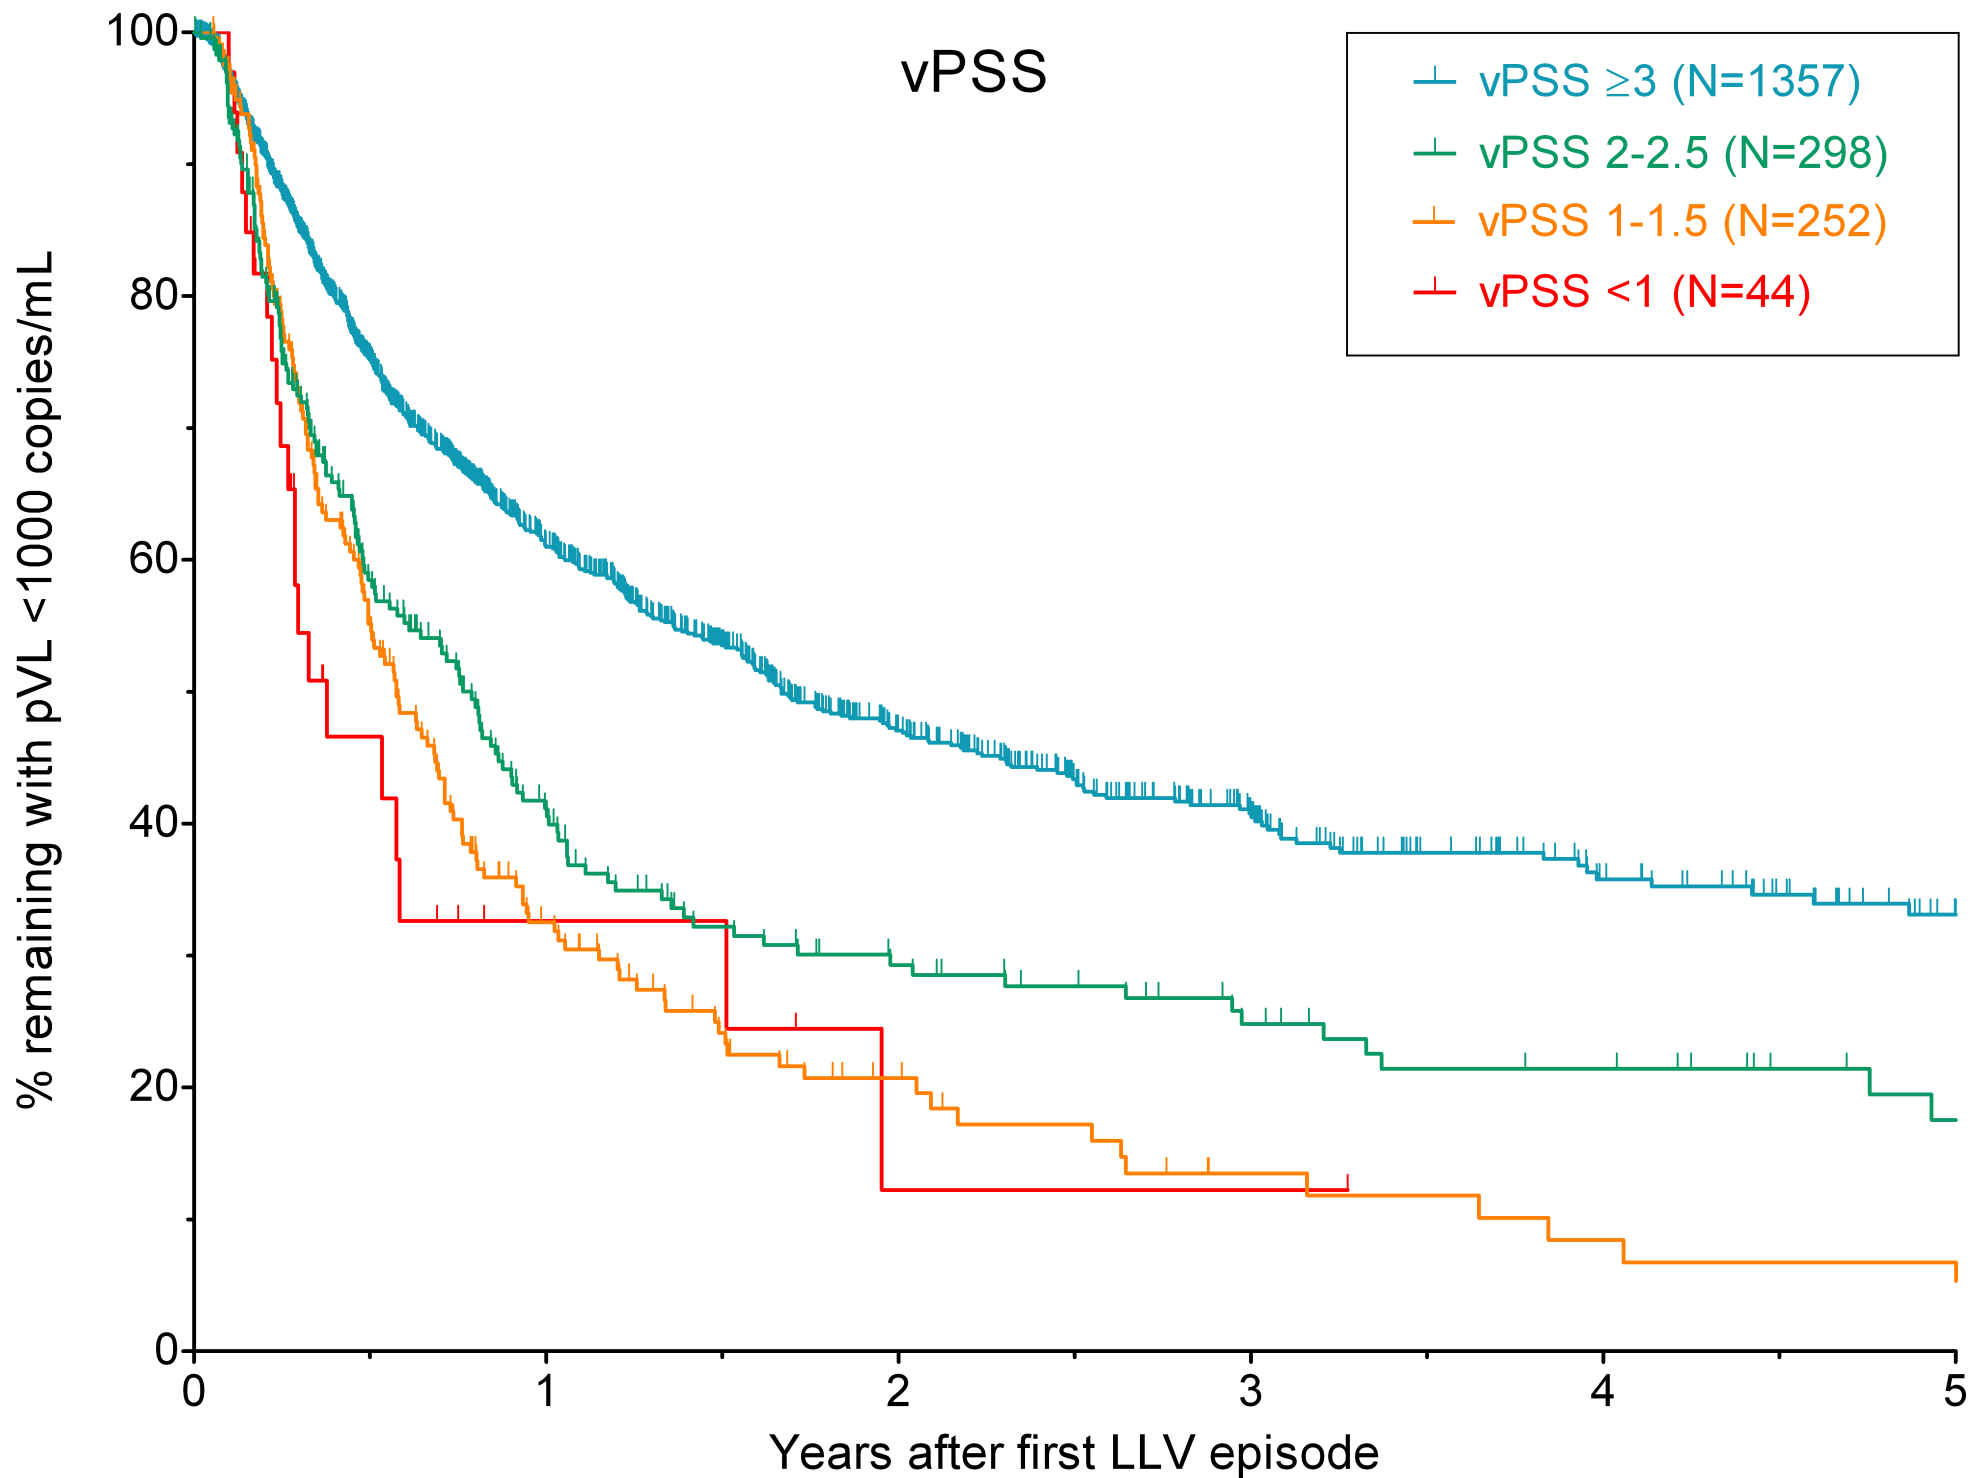

Supplement: NIHMS647292-supplement-SuppFig1.pdf [file NIHMS647292-supplement-SuppFig1.pdf]

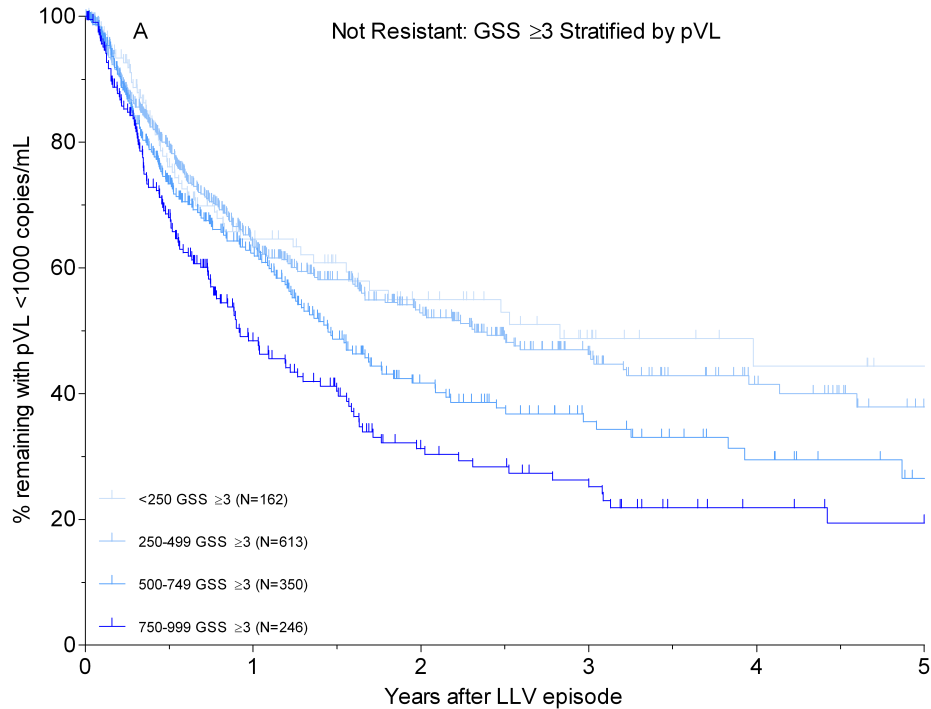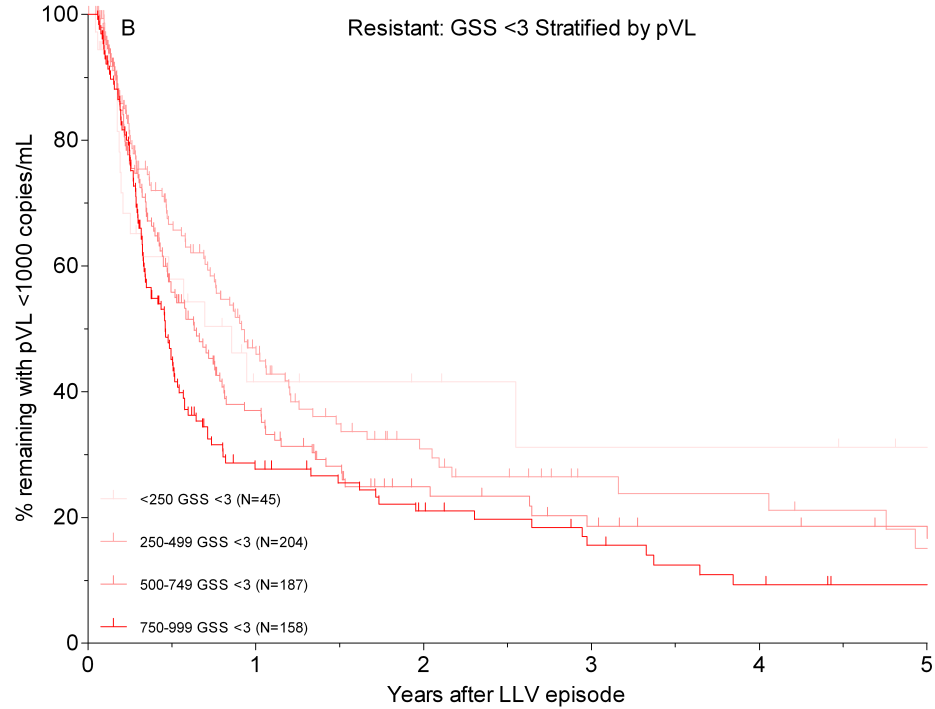

Supplement: NIHMS647292-supplement-SuppFig2.pdf [file NIHMS647292-supplement-SuppFig2.pdf]

# Outcomes after changing therapy

p<0.001

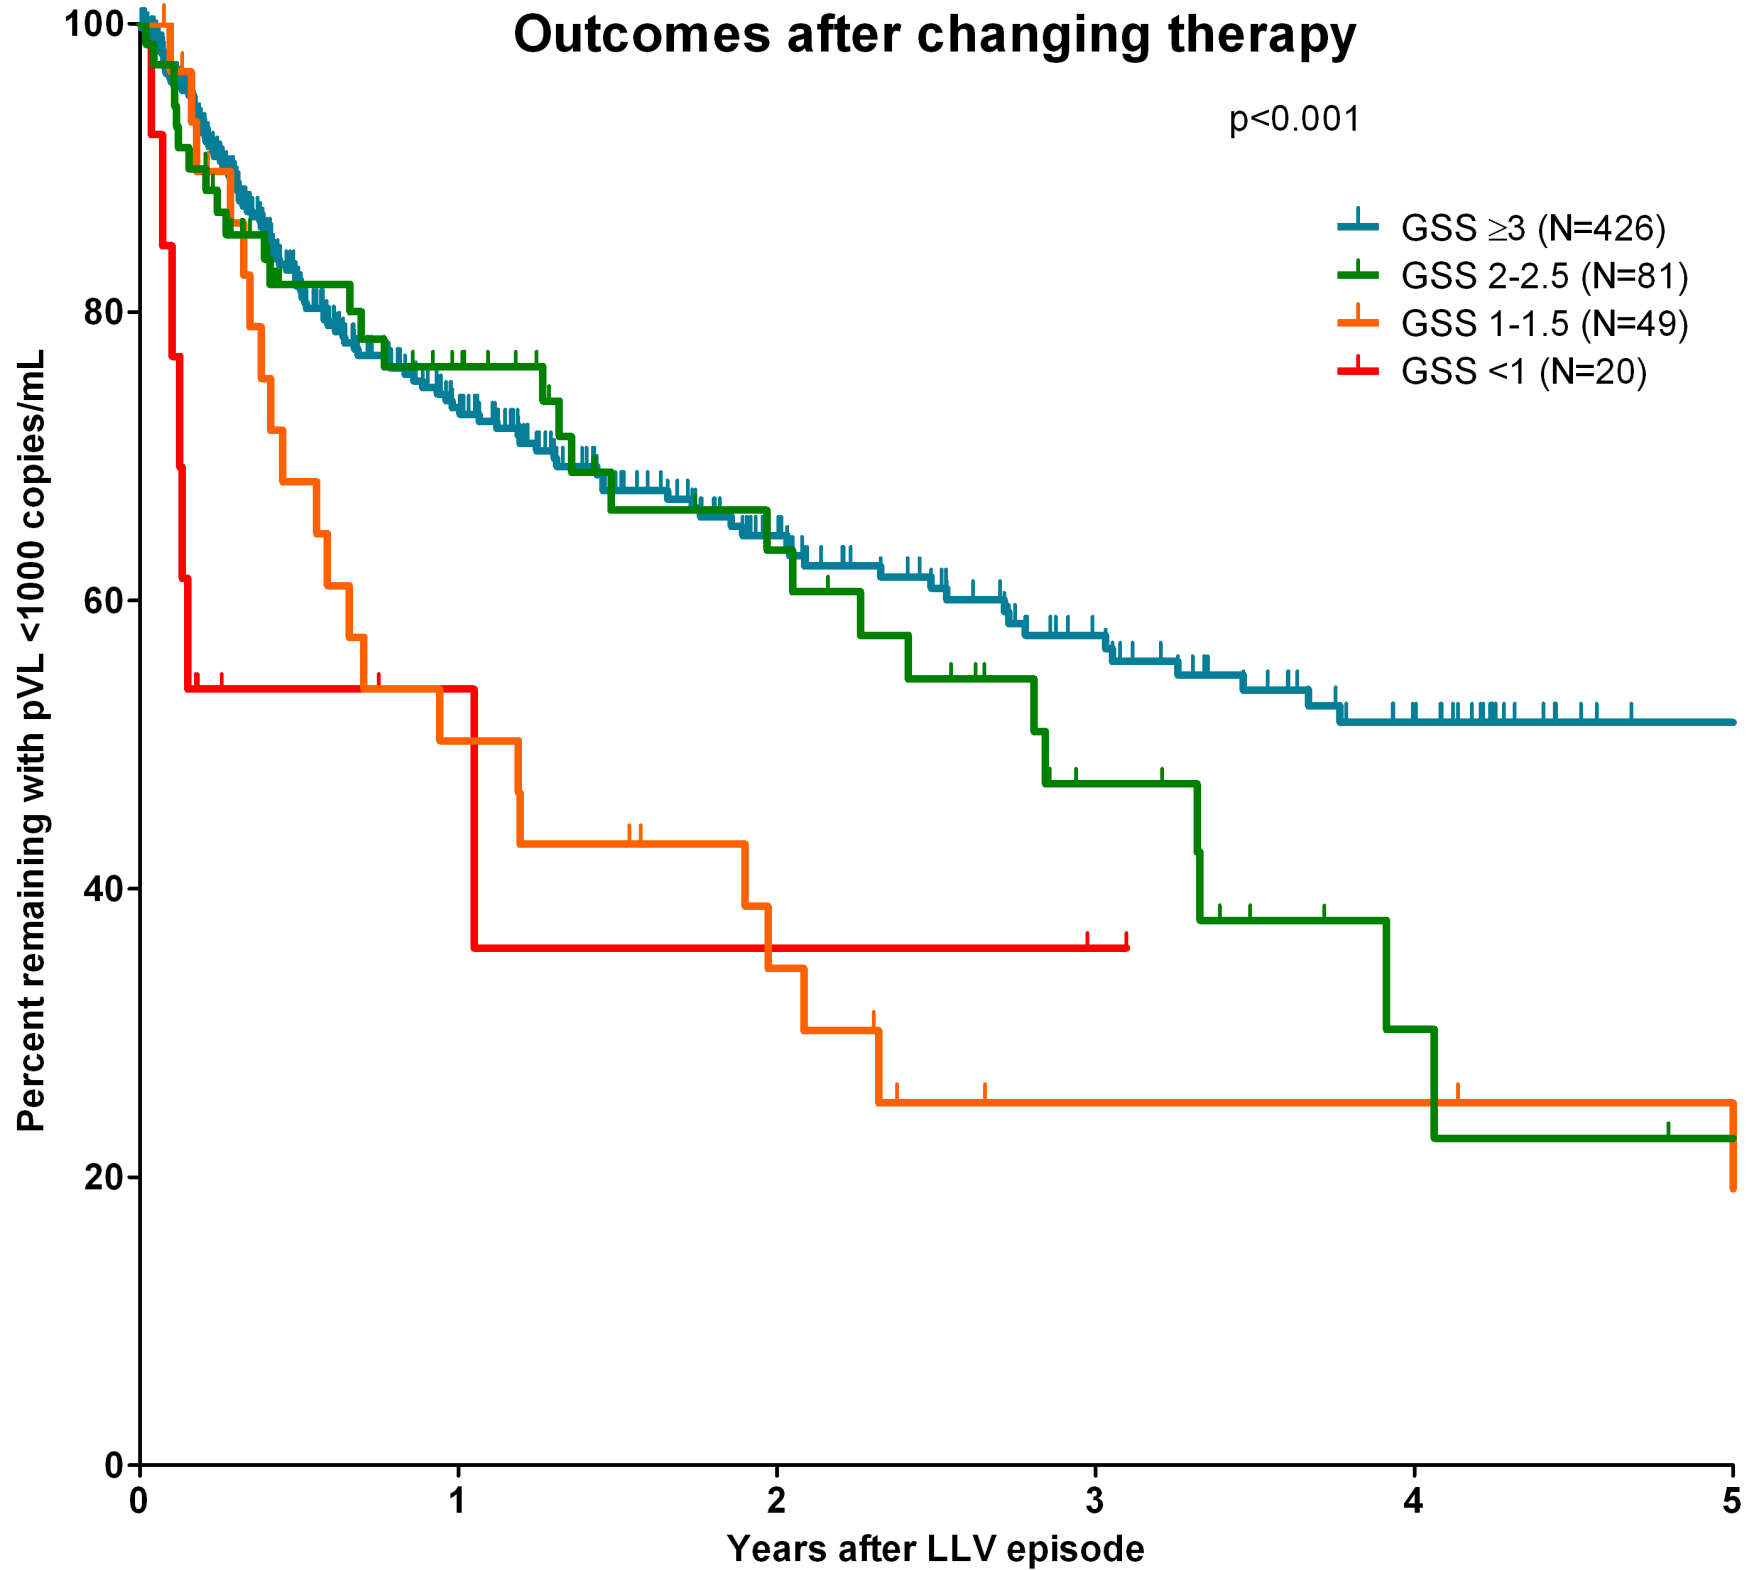

Supplement: NIHMS647292-supplement-SuppFig3.pdf [file NIHMS647292-supplement-SuppFig3.pdf]

# Resistance testing successful or failed

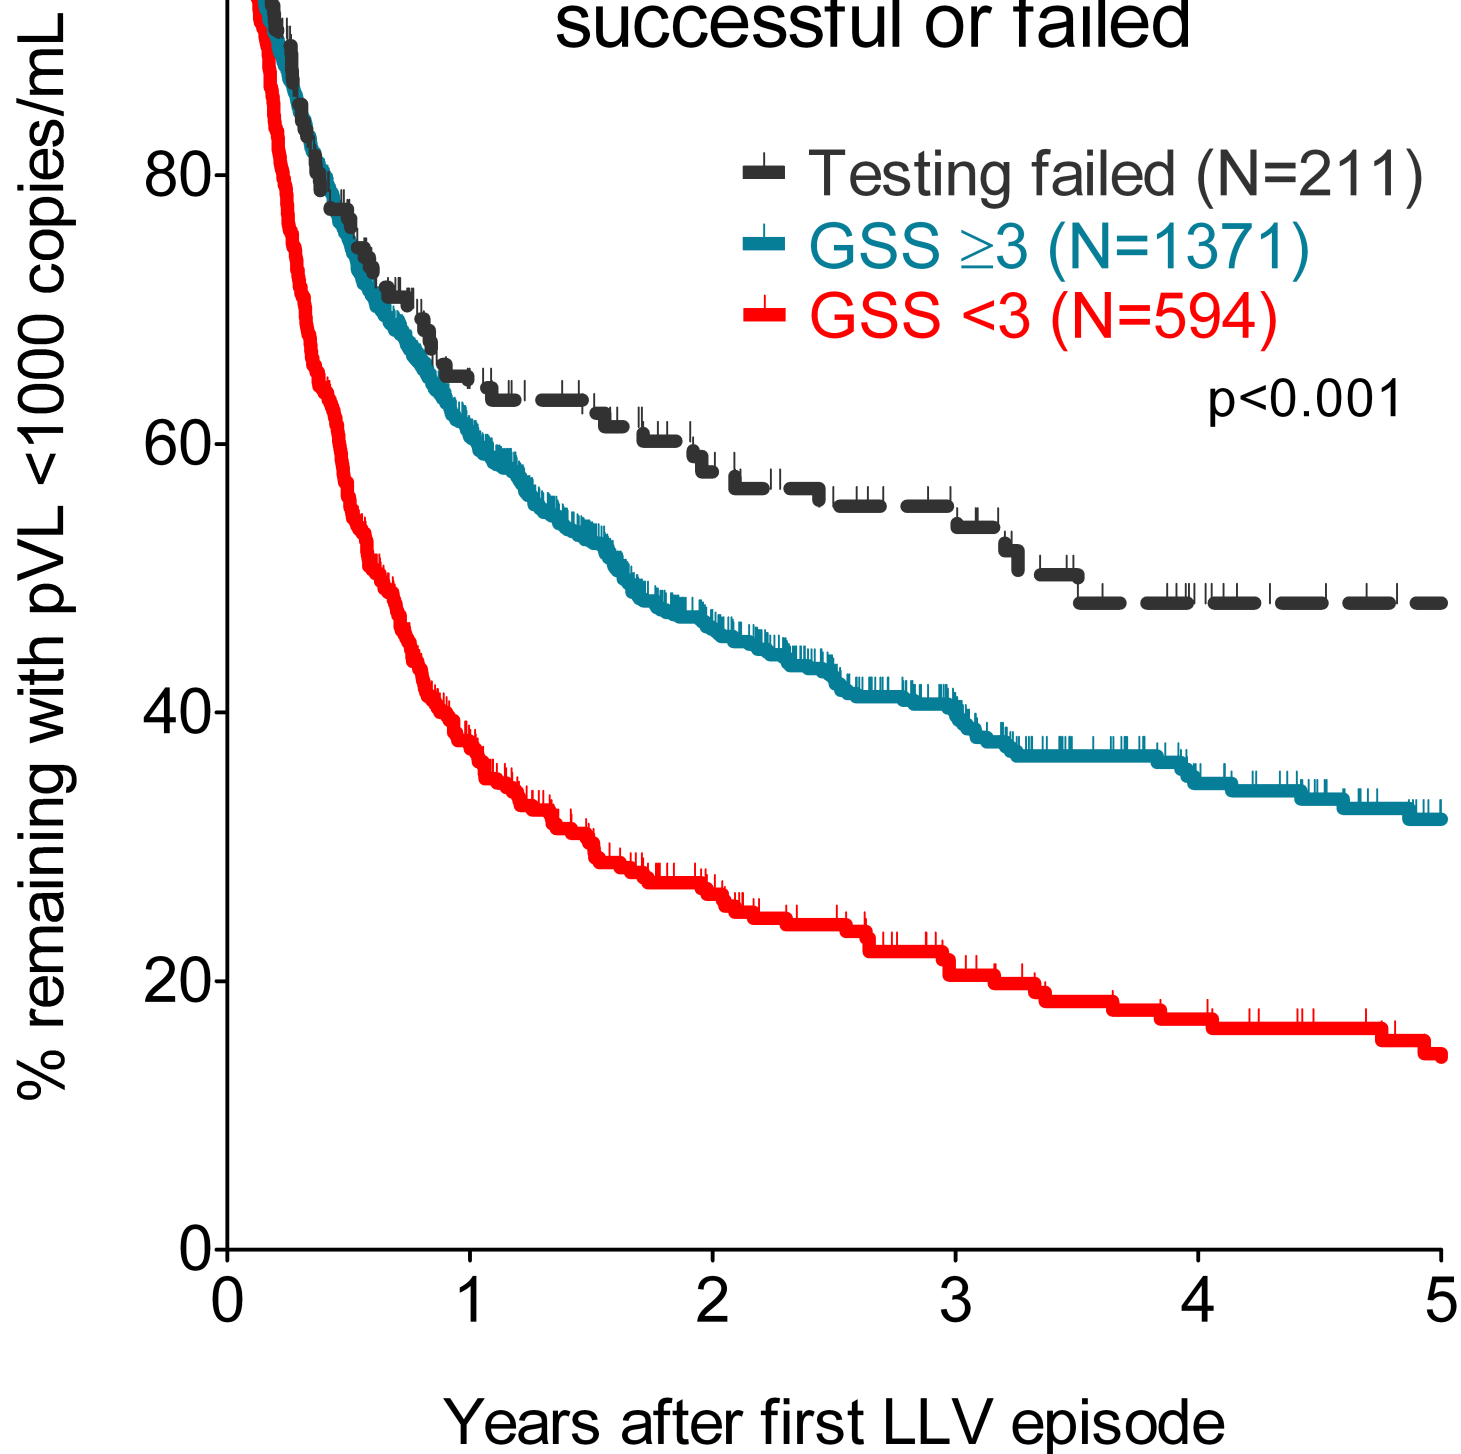

Supplement: NIHMS647292-supplement-SuppFig4.pdf [file NIHMS647292-supplement-SuppFig4.pdf]

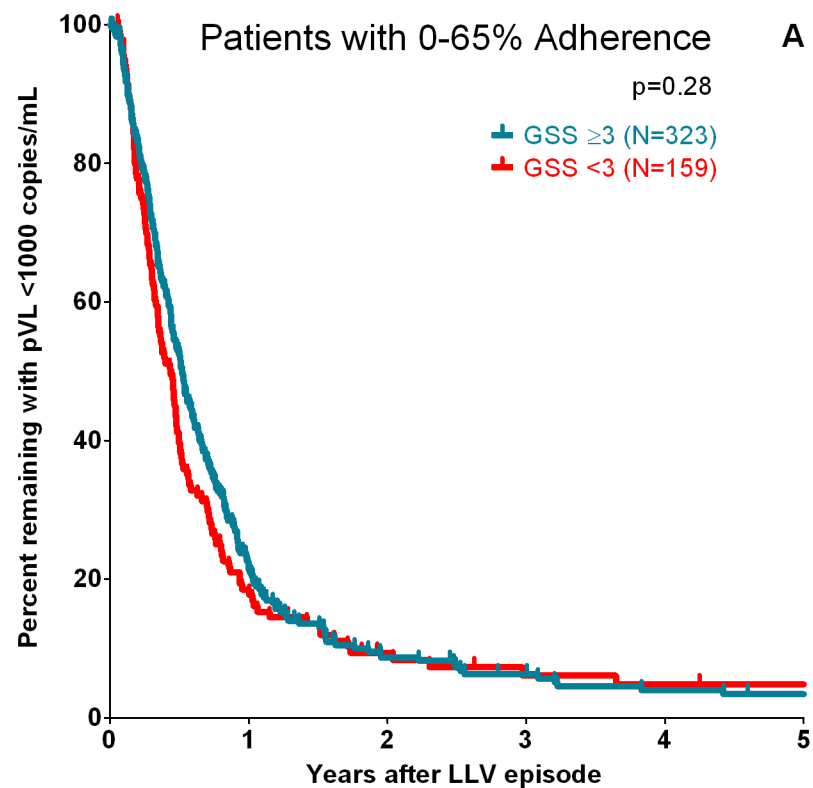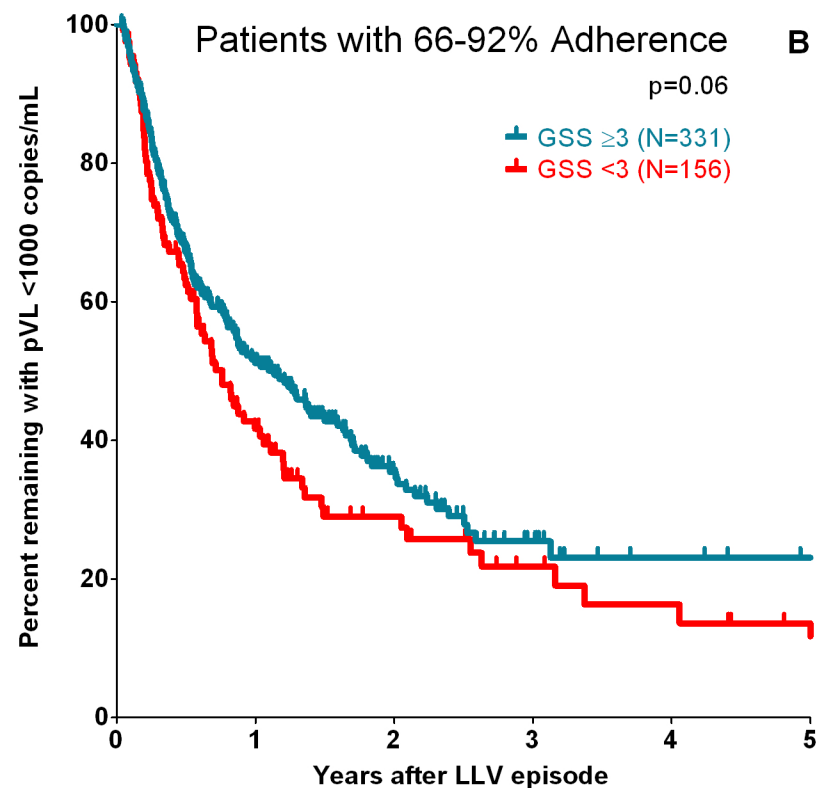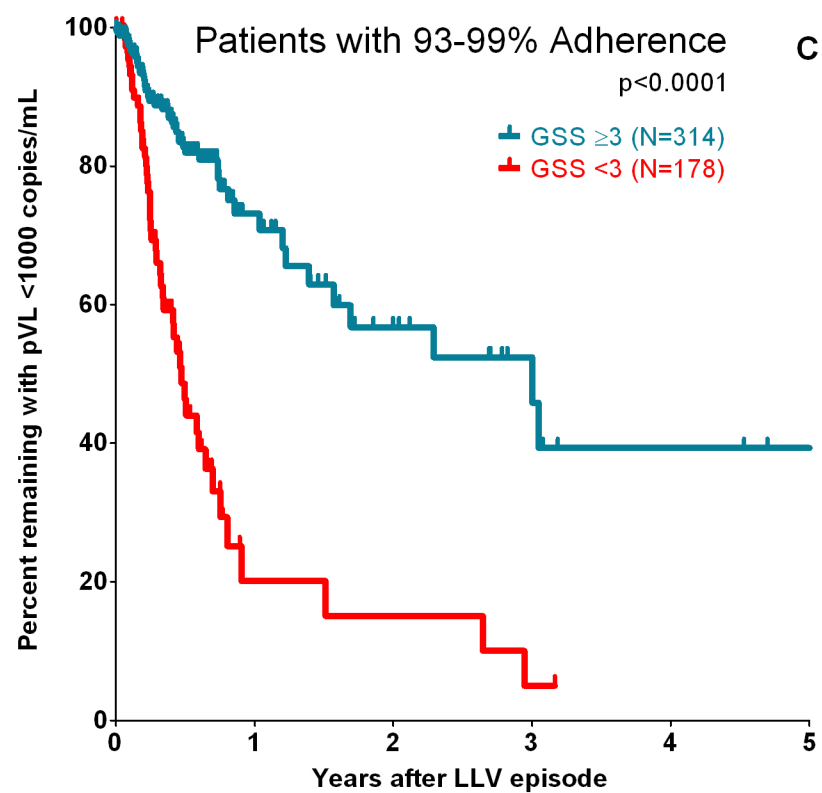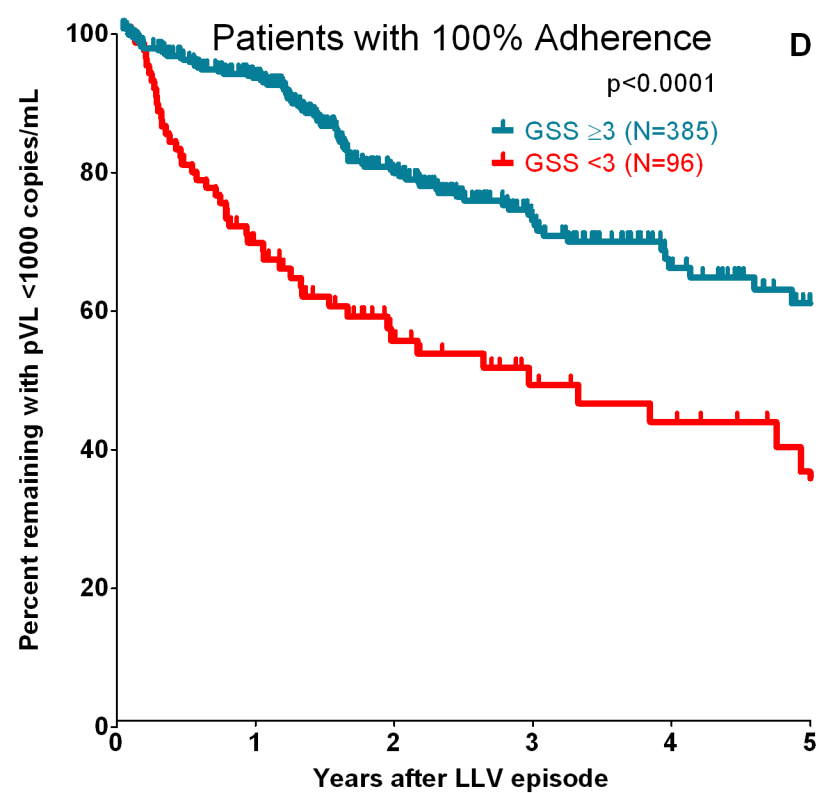

Supplement: NIHMS647292-supplement-SuppFig5.pdf [file NIHMS647292-supplement-SuppFig5.pdf]
